# Supplementary material for: Indoleamine 2,3-dioxygenase 1 deficiency attenuates CCl4-induced fibrosis through Th17 cells down-regulation and tryptophan 2,3-dioxygenase compensation
Source: PubMed Central journal article supplement (PMC5522192; doi:10.18632/oncotarget.17119), 2017-04-15
Supplement: oncotarget-08-40486-s001.pdf [file oncotarget-08-40486-s001.pdf]

# Indoleamine 2,3-dioxygenase 1 deficiency attenuates CCl<sub>4</sub>-induced fibrosis through Th17 cells down-regulation and tryptophan 2,3-dioxygenase compensation

## Supplementary Materials

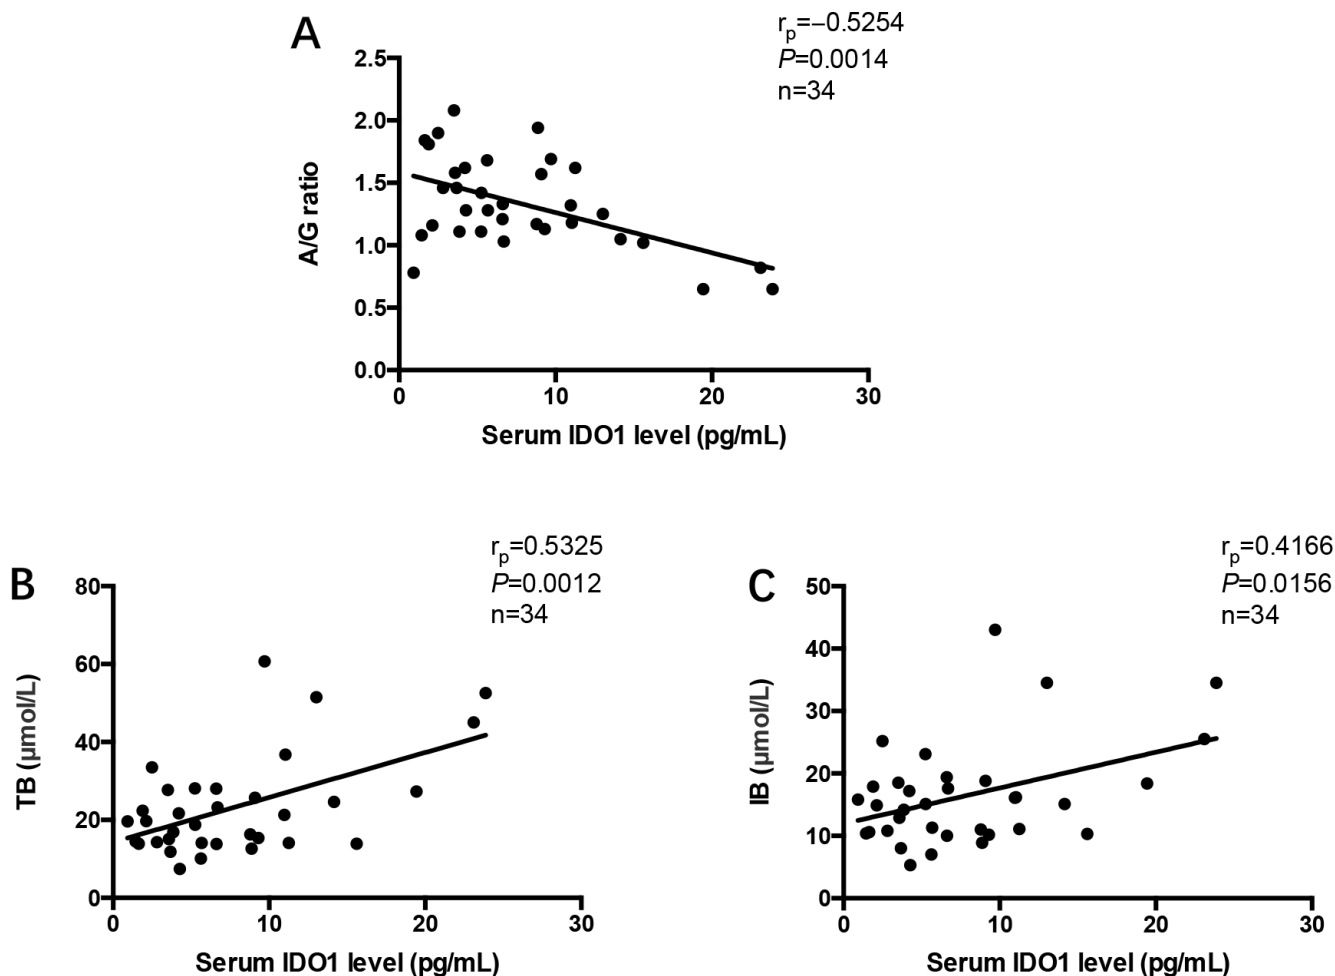

**Supplementary Figure 1:** (A), (B) and (C) Pearson linear correlation tests for IDO1 and A/G ratio, TB and IB levels in the serum of patients.  $r_p$ : Pearson's correlation coefficient. Data are presented as the mean  $\pm$  SEM (\* $P < 0.05$ , \*\* $P < 0.01$ , \*\*\* $P < 0.001$ , \*\*\*\* $P < 0.0001$ ).

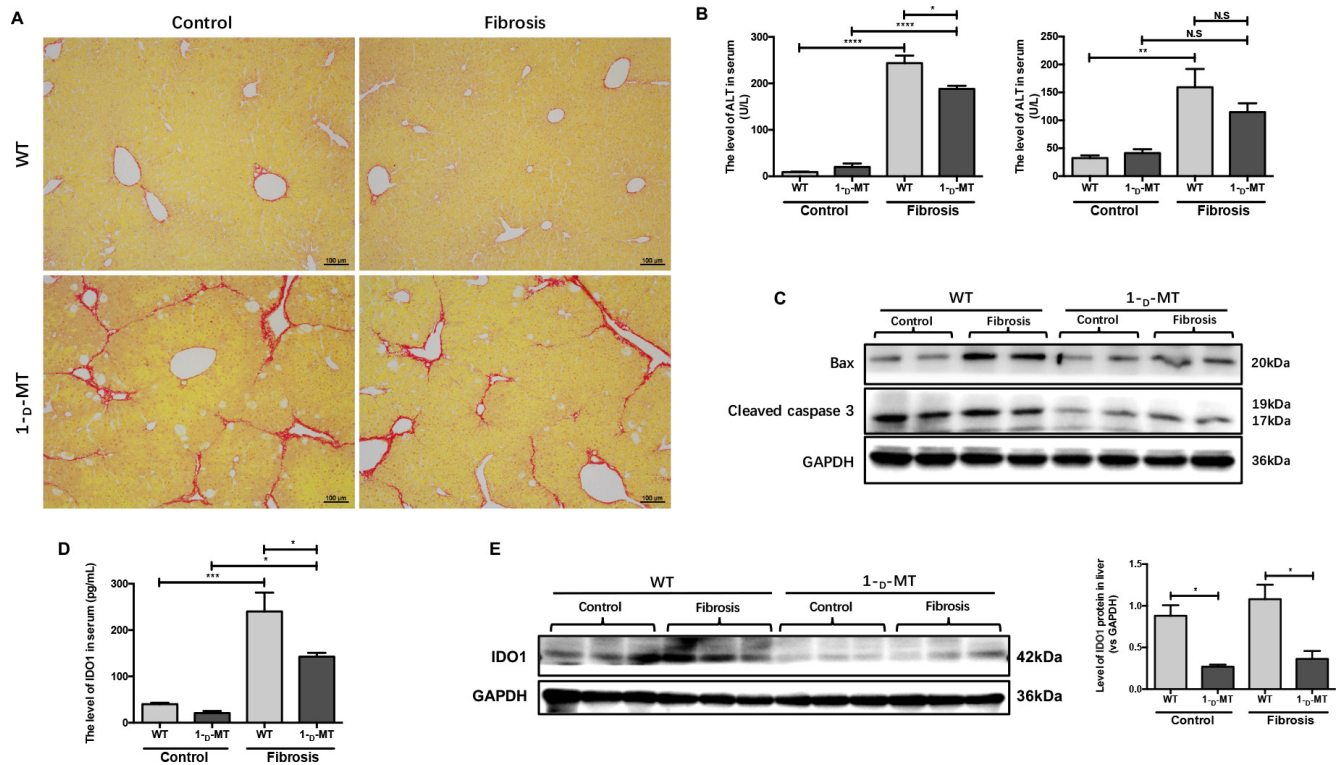

**Supplementary Figure 2:** (A) Sirius red staining of liver sections. (B) Liver lesions were assessed by measuring serum ALT and AST levels in WT and 1-D-MT mice. (C) Western blot analysis of the expression of  $\alpha$ -SMA, Bax and cleaved caspase 3 in WT and 1-D-MT mice. (D) ELISA evaluating the serum IDO1 level in WT and 1-D-MT mice. (E) Western blot analysis of the expression of IDO1 in WT and 1-D-MT mice. The data are presented as the means  $\pm$  SEM (\* $P$  < 0.05, \*\* $P$  < 0.01, \*\*\* $P$  < 0.001, \*\*\*\* $P$  < 0.0001).

**Supplementary Table 1A: Primer sequences for quantitative real-time PCR**

| Target gene    | Forward primer (5'→3') | Reverse primer (5'→3') |
|----------------|------------------------|------------------------|
| IL-17a         | GCTGACCCCTAAGAAACCCC   | GAAGCAGTTTGGGACCCCTT   |
| IL-6           | CCCCAATTTCCAATGCTCTCC  | CGCACTAGGTTTGCCGAGTA   |
| TGF- $\beta$ 1 | CAACCCAGGTCCTTCCTAAA   | GGAGAGCCCTGGATACCAAC   |
| TNF- $\alpha$  | AGGGTCTGGGCCATAGAACT   | CCACCACGCTCTTCTGTCTAC  |
| IL-1 $\beta$   | GGTCAAAGGTTTGGAAGCAG   | TGTGAAATGCCACCTTTTGA   |

**Supplementary Table 1B: Primer sequences for mice genotyping**

| Primer   | 5' Label | Sequence 5'→3'             | 3' Label | Label Primer Type |
|----------|----------|----------------------------|----------|-------------------|
| oIMR4164 |          | TGG AGC TGC CCG ACG C      |          | Wild type Forward |
| oIMR6916 |          | CTT GGG TGG AGA GGC TAT TC |          | Mutant Forward    |
